# Supplementary material for: Clinical and biochemical characterization of four patients with mutations in ECHS1
Source: PubMed Central journal article supplement (PMC4474341; doi:10.1186/s13023-015-0290-1), 2015-06-18
Supplement: 13023_2015_290_MOESM2_ESM.pdf [file 13023_2015_290_MOESM2_ESM.pdf]

Additional file 2: Mitochondrial respiratory chain analysis in tissues from patient 1 and 2

|                       | <b>Patient 1</b>                              | <b>Patient 2</b>                              |                          | <b>Patient 1</b>               | <b>Patient 2</b>               |
|-----------------------|-----------------------------------------------|-----------------------------------------------|--------------------------|--------------------------------|--------------------------------|
|                       | <b>Activity<sup>1</sup></b><br><b>(%mean)</b> | <b>Activity<sup>1</sup></b><br><b>(%mean)</b> | <b>Average (5 -95 %)</b> | <b>Z-score</b><br><b>of LN</b> | <b>Z-score</b><br><b>of LN</b> |
| <b><i>SKIN:</i></b>   |                                               |                                               |                          |                                |                                |
| Complex 1             | NA                                            | 124.8 (149%)                                  | 83.7 (48.9-120.1)        | NA                             | 1.4                            |
| Complex 2             | NA                                            | 331.5 (137%)                                  | 242.7 (144.4-349.2)      | NA                             | 1.2                            |
| Complex 3             | NA                                            | 11.0 (64%)                                    | 17.2 (7.9-30.4)          | NA                             | -0.6                           |
| Complex 2+3           | NA                                            | 91.6 (60%)                                    | 152.1 (102.1-210.6)      | NA                             | -1.8                           |
| Complex 4             | NA                                            | 3.5 (80%)                                     | 4.4 (2.1-6.8)            | NA                             | -0.3                           |
| Citrate synthase      | NA                                            | 463.2 (122%)                                  | 379.0 (245.4-540.4)      | NA                             | 0.8                            |
| <b><i>LIVER:</i></b>  |                                               |                                               |                          |                                |                                |
| Complex 1             | 15.1 (43%)                                    | 21.8 (62%)                                    | 35.3 (14.4-56.0)         | -1.5                           | -0.8                           |
| Complex 2             | 113.8 (49%)                                   | 175.2 (75%)                                   | 232.5 (174.7-309.8)      | -2.7                           | -1.0                           |
| Complex 3             | 8.5 (45%)                                     | 11.2 (59%)                                    | 19.0 (13.8-27.6)         | -1.7                           | -1.1                           |
| Complex 2+3           | 47.3 (80%)                                    | 84.4 (143%)                                   | 58.9 (10.8-107.3)        | 0.0                            | 0.8                            |
| Complex 4             | 2.5 (138%)                                    | 2.8 (160%)                                    | 1.8 (0.5-3.2)            | 0.8                            | 1.1                            |
| Citrate synthase      | 87.0 (103%)                                   | 70.1 (83%)                                    | 84.4 (59.5-109.3)        | 0.3                            | -0.5                           |
| <b><i>MUSCLE:</i></b> |                                               |                                               |                          |                                |                                |
| Complex 1             | 48.1 (107%)                                   | 47.8 (106%)                                   | 45.2 (23.6-74.8)         | 0.4                            | 0.3                            |
| Complex 2             | 48.9 (55%)                                    | 35.6 (40%)                                    | 89.2 (49-133.4)          | -1.6                           | -2.6                           |
| Complex 3             | 5.3 (31%)                                     | 6.2 (36%)                                     | 17.3 (5.7-31.4)          | -1.5                           | -1.3                           |
| Complex 2+3           | 50.5 (80%)                                    | 63.8 (101%)                                   | 63.1 (34.2-107.6)        | -0.4                           | 0.2                            |
| Complex 4             | 1.7 (65%)                                     | 1.6 (62%)                                     | 2.6 (1.1-3.8)            | -0.8                           | -0.9                           |
| Citrate synthase      | 157.0 (61%)                                   | 151.6 (59%)                                   | 257.2 (159.8-353.3)      | -1.7                           | -1.9                           |

<sup>1</sup> Activity is measured in nmol/min.mg protein

---

NA, not available
