# Supplementary material for: Clinical and biochemical characterization of four patients with mutations in ECHS1
Source: Springer Nature journal article supplement (doi:10.1186/s13023-015-0290-1), 2015-06-17
Supplement: MOESM3 [file 9776158]

Additional file 3: Activity of the pyruvate dehydrogenase complex in HepG2 cells after incubation with methacrylic and acrylic acid.

| Sample                  | PDHC Activity<br>(nmol CO <sub>2</sub> /(min.mg protein)) |
|-------------------------|-----------------------------------------------------------|
| HepG2 control           | 4.54 +/- 0.69                                             |
| 1 nM methacrylic acid   | 5.37 +/- 0.28                                             |
| 100 nM methacrylic acid | 5.11 +/- 0.67                                             |
| 1 μM methacrylic acid   | 5.15 +/- 0.05                                             |
| 100 μM methacrylic acid | 4.93 +/- 0.47                                             |
| 1 nM acrylic acid       | 4.70 +/- 0.42                                             |
| 100 nM acrylic acid     | 4.88 +/- 0.47                                             |
| 1 μM acrylic acid       | 5.4 +/- 0.6                                               |
| 100 μM acrylic acid     | 4.96 +/- 0.35                                             |
